# Supplementary material for: Co-transcriptional splicing efficiency is a gene-specific feature that can be regulated by TGFβ
Source: PubMed Central journal article supplement (PMC8960766; doi:10.1038/s42003-022-03224-z), 2022-03-28
Supplement: 42003_2022_3224_MOESM3_ESM.pdf [file 42003_2022_3224_MOESM3_ESM.pdf]

## Description of Additional Supplementary Files

**File name: Supplementary Data 1.**

**Description:** List of junction-based Intron splicing Index ISlj and coverage-based Intron splicing Index ISlc values for all analyzed introns.

**File name: Supplementary Data 2.**

**Description:** List of Gene Splicing Index (GSI) values for all expressed genes.

**File name: Supplementary Data 3.**

**Description:** List of differential GSI values ( $\Delta$ GSI) at 2 h or 12 h versus vehicle-treated (control) cells.

**File name: Supplementary Data 4.**

**Description:** Sample size (n) used to derive statistics for all set of data.

**File name: Supplementary Data 5.**

**Description:** Source data for all graphs and charts.
